# Supplementary material
Source: Springer Nature journal article supplement (https://www.springermedizin.de/resource/supplementary/12891_2013_1913_MOESM3_ESM.pdf/9508780)
Supplement: MOESM3 [file 9508780]

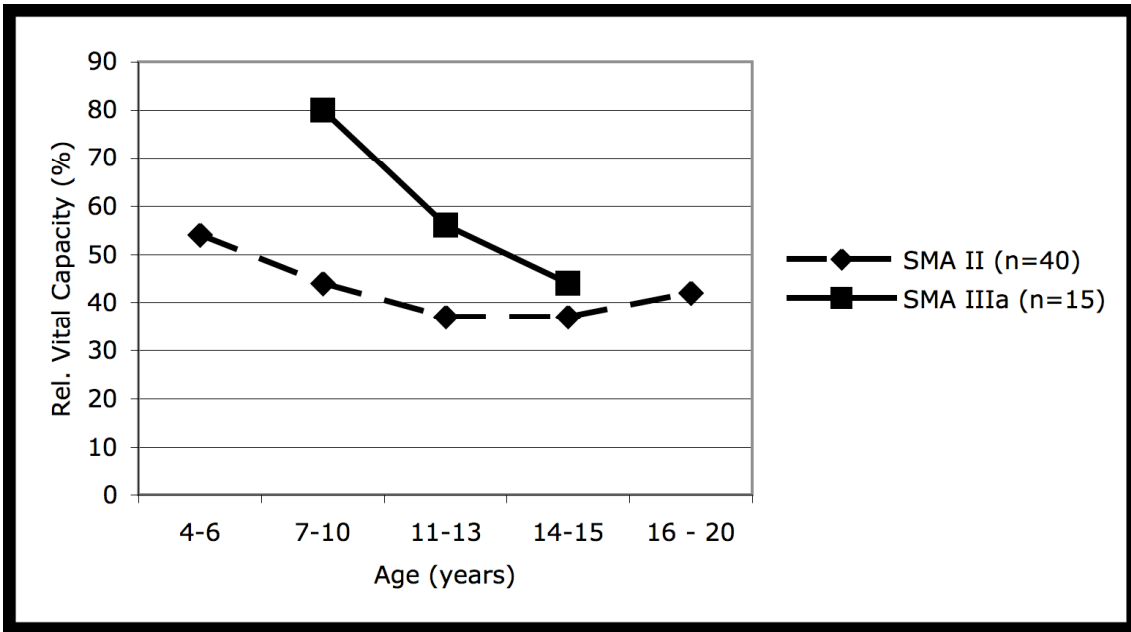

Figure 3: Course of the relative inspiratory vital capacity in SMA II and IIIa patients not operated on
